# Supplementary material
Source: MDPI journal article supplement (https://www.mdpi.com/2071-1050/16/3/1343)
Supplement: s1 [file s1]

# **The biodiversity impact of health care: quantifying the extinction-risk footprint of health care in the Netherlands and other European countries**

**Authors:** Amanda Irwin<sup>1</sup>, Arne Geschke<sup>1</sup>, Johan P. Mackenbach<sup>2</sup>

**Affiliations:**

1. ISA, School of Physics, A28, The University of Sydney, NSW, 2006, Australia
2. Department of Public Health, Erasmus MC, Rotterdam, Netherlands

## Supplementary Material

### Table of contents

|                                                                                               |    |
|-----------------------------------------------------------------------------------------------|----|
| Supplementary material S1: Detailed methods.....                                              | 2  |
| Supplementary material S2: Sectoral structure of the Dutch economy.....                       | 4  |
| Supplementary material S3: Extinction-risk footprint data for additional countries.....       | 5  |
| Supplementary material S4: Additional data for top 10 countries.....                          | 8  |
| Supplementary material S5: Top 40 countries impacted by consumption of Dutch health care..... | 10 |
| Supplementary material S6: Top 10 species impacted by consumption of Dutch health care.....   | 11 |
| Supplementary references.....                                                                 | 12 |

## S1: Detailed methods

### *Generating the satellite block from the Information on the IUCN Red List*

Species data was downloaded from the IUCN Red List version 2020-2 [1], with the species scope limited to comprehensively assessed species to ensure there was no geographic bias in the species assessment. The extinction risk category for each species was assigned a numeric value in equal steps ranging from 0 for Least Concern and Data Deficient, to 4 for Critically Endangered [2]. Next, each threat acting on that species was assigned a numeric Threat Impact score based on the scope and severity recorded for that threat, with a minimum value of 0 and a maximum value of 63 for a threat which is expected to cause very rapid declines in the whole population. Only threats with a timing value of Ongoing or Future were assigned a Threat Impact score, and where there was no information on the scope or severity of a threat the median possible value was used [3]. The extinction risk category value for each species was multiplied by the Threat Impact score for each threat acting on it to calculate the nSTAR value for each species-threat combination.

To allocate this nSTAR value to economic sectors, each of the threat classes used in the IUCN Red List [4] was assessed to determine which economic sectors are likely to be directly implicated in the activity generating that threat, with for example, the cultivation of rice allocated to Threat 2.1 - Annual & perennial non-timber crops. The binary concordance created by this allocation was then weighted according to the size of each economic sector and applied to the nSTAR values for each species-threat combination to calculate the nSTAR value associated with each species-sector combination. This sector to threat concordance is available at: <https://hdl.handle.net/2123/24233>.

Area of habitat (AOH) data was also derived from the species data in the IUCN Red List, which includes global species range data, elevation, and habitat preferences. When combined, these data created an AOH map for each species [5], which was used in conjunction with geographic boundary data to calculate the proportion of each species' AOH found in each country. This information was then applied to the nSTAR value for each species-sector combination to calculate a nSTAR value for each species-sector-country combination. Once these calculations were complete, 4,776 terrestrial bird, mammal, and amphibian species remained with a material nSTAR value. More detail on the methodology used to calculate the nSTAR metric, including associated limitations, is available in Irwin et al. [6].

### *Calculating the extinction-risk footprint*

The nSTAR value for each species-sector-country combination was then manipulated to match the country-sector structure of the Eora MRIO [7], creating a 4,776 x 14,839 satellite block  $\mathbf{Q}$ . The Eora MRIO provided an intermediate transaction matrix  $\mathbf{T}$ , a value-added matrix  $\mathbf{V}$ , and a final demand matrix  $\mathbf{Y}$ . The total output vector for this economic system,  $\mathbf{x}$ , was calculated from these matrices and then diagonalised and inverted to provide the matrix  $\hat{\mathbf{X}}^{-1}$ . The total requirements matrix  $\mathbf{A}$  was calculated by matrix multiplication of  $\mathbf{T}$  and  $\hat{\mathbf{X}}^{-1}$ , and the Leontief Inverse  $\mathbf{L}$  derived following equation (S1).

$$\mathbf{L} = (\mathbf{I} - \mathbf{A})^{-1} \quad (\text{S1})$$

where  $\mathbf{I}$  is an identity matrix equal in size to the intermediate transaction matrix  $\mathbf{T}$ .

The direct intensity matrix  $\mathbf{Z}$  was derived from the satellite block  $\mathbf{Q}$  through matrix multiplication of  $\mathbf{Q}$  and  $\hat{\mathbf{X}}^{-1}$ , and provided information on the extinction risk embodied in \$USD1 worth of total output from each sector. Given the three matrices  $\mathbf{Z}$ ,  $\mathbf{L}$ , and  $\mathbf{Y}$ , the extinction-risk footprint ( $\mathbf{f}_k$ ) for a given sector  $k$  was calculated using equation (S2).

$$\mathbf{f}_k = \mathbf{Z} * \mathbf{L} * \mathbf{Y}_k \quad (\text{S2})$$

More details on this methodology and its limitations are available in Irwin et al. [6].

The extinction-risk footprint derived using equation (S2) quantifies the impact that consumption at the point of final demand has on the extinction risk of all species in scope. In order to deconstruct this impact at a different point in the supply chain we generated a deconstructed footprint. First, the net multiplier matrix  $\mathbf{N}$  was calculated by multiplying the diagonalised total final demand matrix  $\hat{\mathbf{Y}}_{total}$  with  $\hat{\mathbf{X}}^{-1}$ . The multiplier generated here represents the relativity between the total output for each sector and the final demand for that sector [8]. Next, the transaction vector  $\mathbf{t}_i$  for the sector ( $i$ ) was obtained from the intermediate transaction matrix  $\mathbf{T}$  and multiplied element-wise with the value  $\mathbf{N}_{ii}$  to generate the intermediate demand vector  $\mathbf{d}_i$ . With  $\mathbf{d}_i$  substituted into equation (S2) in place of  $\mathbf{Y}$ , the footprint associated with the intermediate expenditure patterns of sector ( $i$ ) were calculated. Here, we used the intermediate expenditure vector for the Dutch health and social work industry sector, which is the 2<sup>nd</sup> order sector for 98% of the top 5,000 structural paths, as the substitute for final demand. This provided insight into the contribution that intermediate expenditure on each other sector makes to the total extinction-risk footprint of the Dutch health care sector.

## S2: Sectoral structure of the Dutch economy

**Table S1: Sectors included within the Eora MRIO [7] for the Netherlands.** Sectors are ranked in order of the size of the extinction-risk footprint generated by consumption of products and services provided by that sector.

| Extinction-risk footprint rank | Sector                                                                                                           |
|--------------------------------|------------------------------------------------------------------------------------------------------------------|
| 1                              | Food products and beverages                                                                                      |
| 2                              | Re-export                                                                                                        |
| 3                              | Tobacco products                                                                                                 |
| 4                              | Construction work                                                                                                |
| 5                              | Hotel and restaurant services                                                                                    |
| 6                              | Public administration and defence services; compulsory social security services                                  |
| 7                              | Health and social work services                                                                                  |
| 8                              | Products of agriculture, hunting and related services                                                            |
| 9                              | Education services                                                                                               |
| 10                             | Wholesale trade and commission trade services, except of motor vehicles and motorcycles                          |
| 11                             | Real estate services                                                                                             |
| 12                             | Machinery and equipment n.e.c.                                                                                   |
| 13                             | Retail trade services, except of motor vehicles and motorcycles; repair services of personal and household goods |
| 14                             | Furniture; other manufactured goods n.e.c.                                                                       |
| 15                             | Chemicals, chemical products and man-made fibres                                                                 |
| 16                             | Motor vehicles, trailers and semi-trailers                                                                       |
| 17                             | Recreational, cultural and sporting services                                                                     |
| 18                             | Other business services                                                                                          |
| 19                             | Other services                                                                                                   |
| 20                             | Other transport equipment                                                                                        |
| 21                             | Trade, maintenance and repair services of motor vehicles and motorcycles; retail sale of automotive fuel         |
| 22                             | Medical, precision and optical instruments, watches and clocks                                                   |
| 23                             | Post and telecommunication services                                                                              |
| 24                             | Office machinery and computers                                                                                   |
| 25                             | Supporting and auxiliary transport services; travel agency services                                              |
| 26                             | Radio, television and communication equipment and apparatus                                                      |
| 27                             | Insurance and pension funding services, except compulsory social security services                               |
| 28                             | Wood and products of wood and cork (except furniture); articles of straw and plaiting materials                  |
| 29                             | Electrical energy, gas, steam and hot water                                                                      |
| 30                             | Printed matter and recorded media                                                                                |
| 31                             | Air transport services                                                                                           |
| 32                             | Land transport; transport via pipeline services                                                                  |
| 33                             | Fabricated metal products, except machinery and equipment                                                        |
| 34                             | Textiles                                                                                                         |
| 35                             | Coke, refined petroleum products and nuclear fuels                                                               |
| 36                             | Research and development services                                                                                |
| 37                             | Renting services of machinery and equipment without operator and of personal and household goods                 |
| 38                             | Wearing apparel; furs                                                                                            |
| 39                             | Leather and leather products                                                                                     |
| 40                             | Computer and related services                                                                                    |
| 41                             | Electrical machinery and apparatus n.e.c.                                                                        |
| 42                             | Financial intermediation services, except insurance and pension funding services                                 |
| 43                             | Membership organisation services n.e.c.                                                                          |
| 44                             | Water transport services                                                                                         |
| 45                             | Rubber and plastic products                                                                                      |
| 46                             | Sewage and refuse disposal services, sanitation and similar services                                             |
| 47                             | Pulp, paper and paper products                                                                                   |
| 48                             | Secondary raw materials                                                                                          |
| 49                             | Basic metals                                                                                                     |
| 50                             | Other non-metallic mineral products                                                                              |
| 51                             | Products of forestry, logging and related services                                                               |
| 52                             | Collected and purified water, distribution services of water                                                     |
| 53                             | Services auxiliary to financial intermediation                                                                   |
| 54                             | Private households with employed persons                                                                         |
| 55                             | Fish and other fishing products; services incidental of fishing                                                  |
| 56                             | Crude petroleum and natural gas; services incidental to oil and gas extraction excluding surveying               |
| 57                             | Other mining and quarrying products                                                                              |
| 58                             | Coal and lignite; peat                                                                                           |
| 59                             | Uranium and thorium ores                                                                                         |
| 60                             | FISIM                                                                                                            |
| 61                             | Metal ores                                                                                                       |

### S3: Extinction-risk footprint data for additional countries

Further information on the extinction-risk footprint and related measures of those European countries that report expenditure on Health care separately from Education and other services are provided in figures S1 – S5.

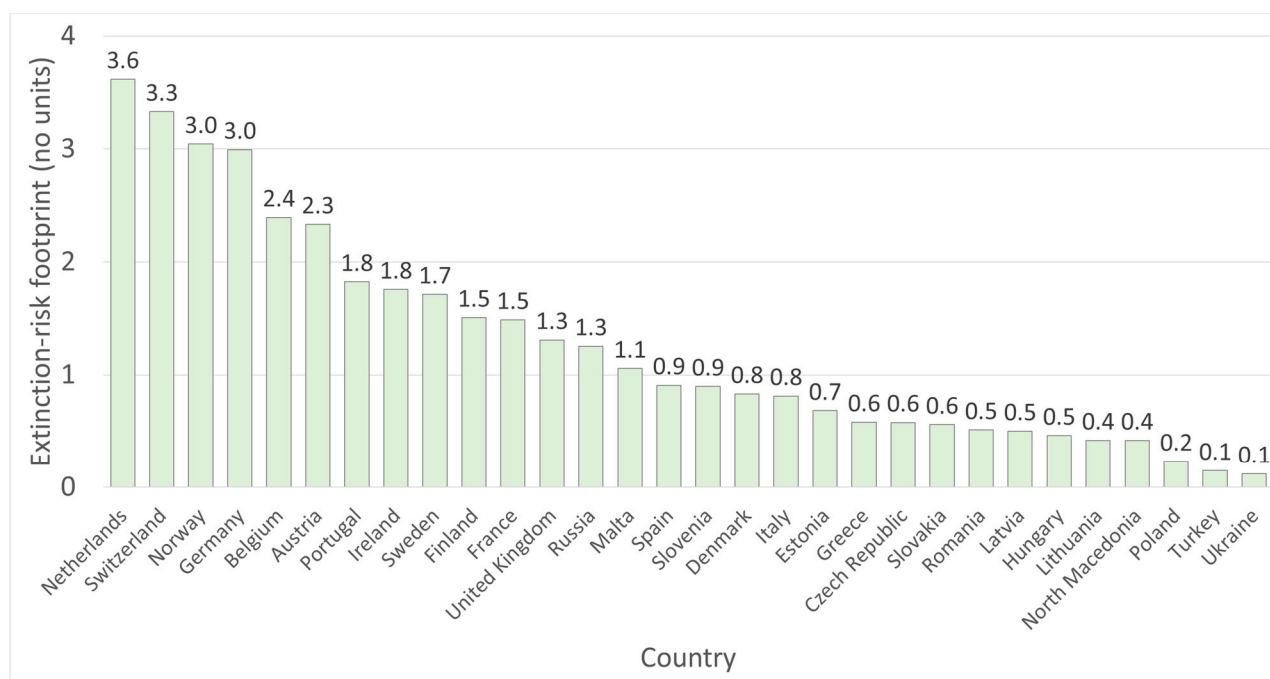

**Figure S1: Health care extinction-risk footprint per million people.** Note that Germany, United Kingdom, and Denmark each use unique sector definitions, so their footprint values may not be directly comparable with the other countries.

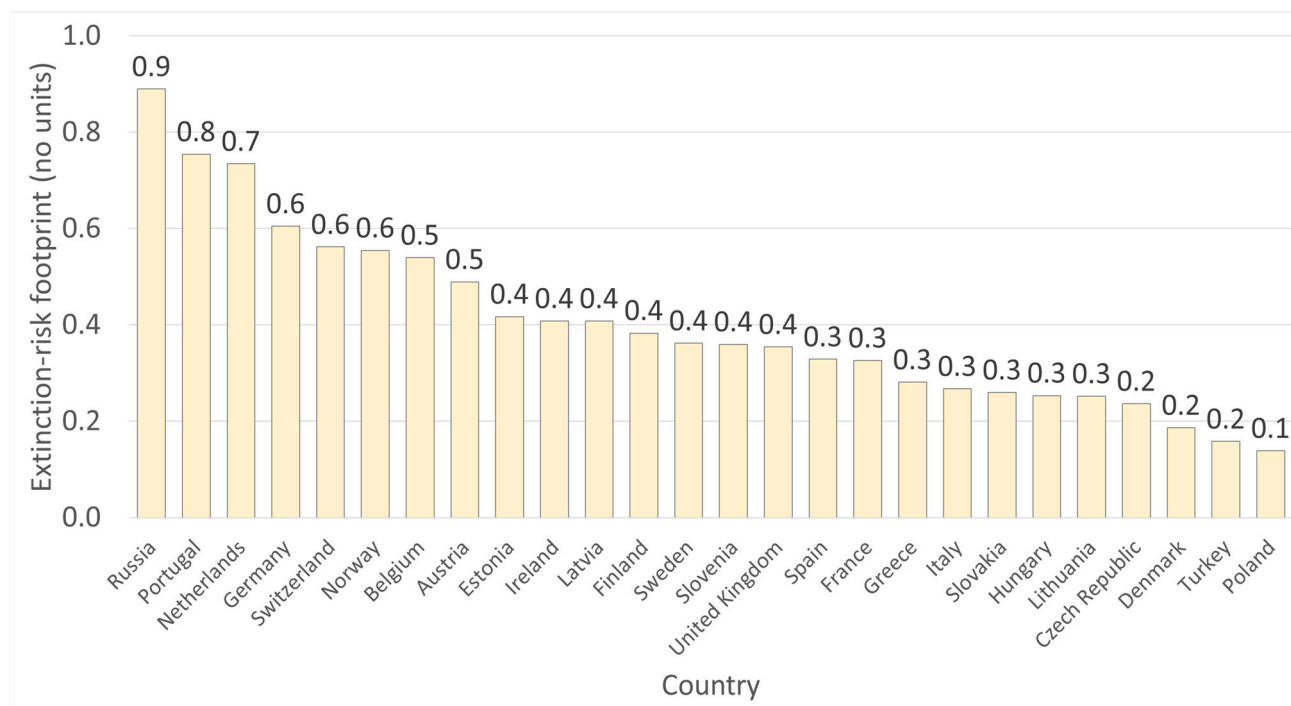

**Figure S2: Health care extinction-risk footprint per \$USD billion expenditure.** Note that Germany, United Kingdom, and Denmark each use unique sector definitions, so their footprint and expenditure values may not be directly comparable with the other countries. Expenditure data are for 2013 per-capita, at current prices and current purchasing power parities (PPPs) [9].

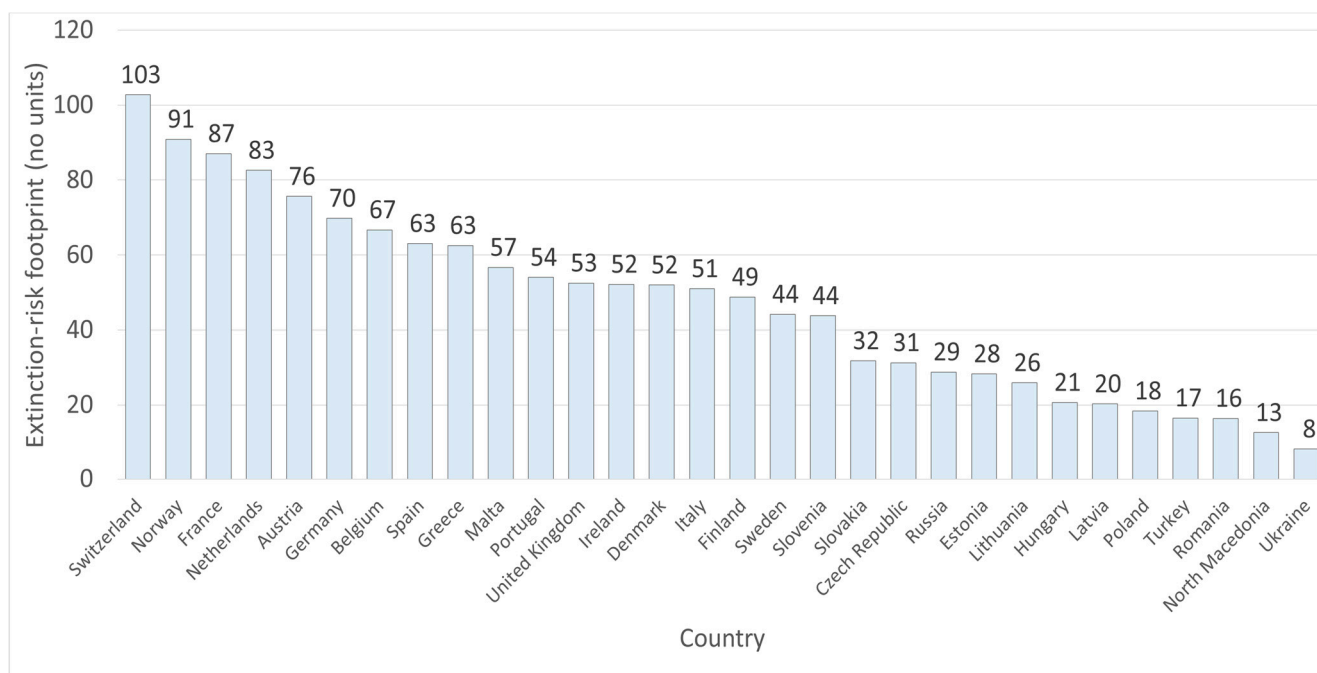

**Figure S3: Total extinction-risk footprint per million people across all sectors.**

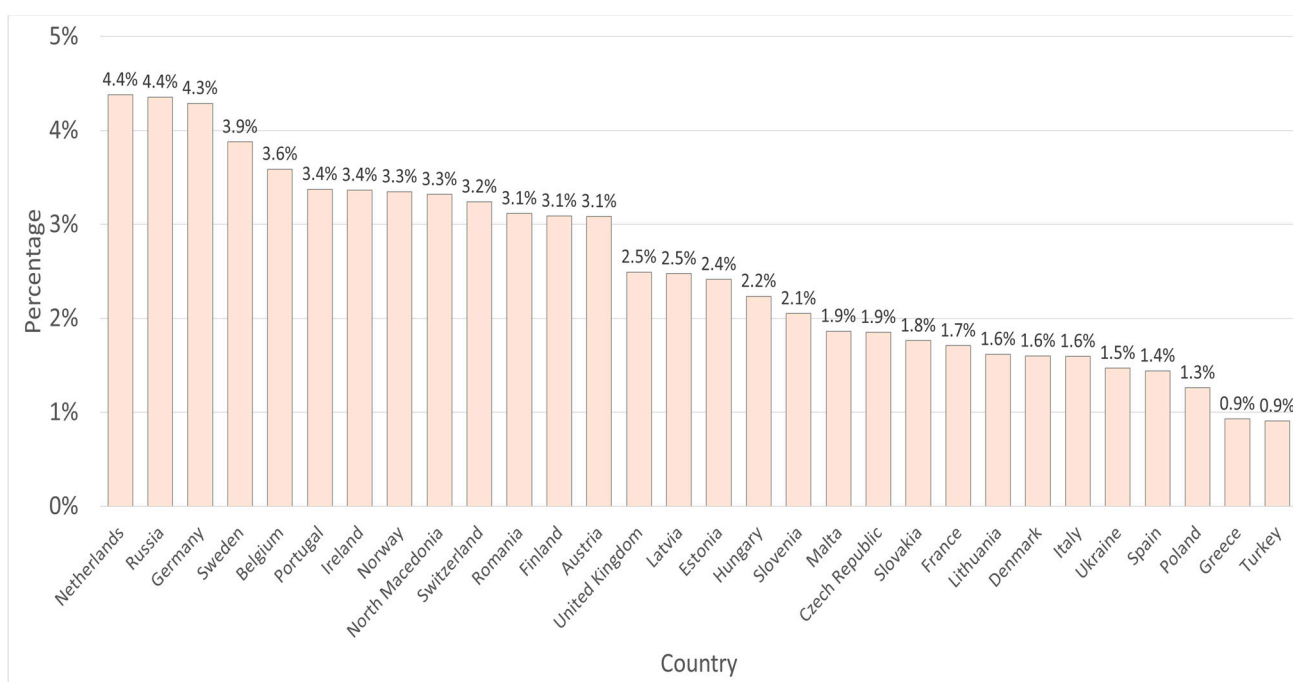

**Figure S4: Health care's extinction-risk footprint as a share of the country total.** Note that Germany, United Kingdom, and Denmark each use unique sector definitions, so their footprint values may not be directly comparable with the other countries.

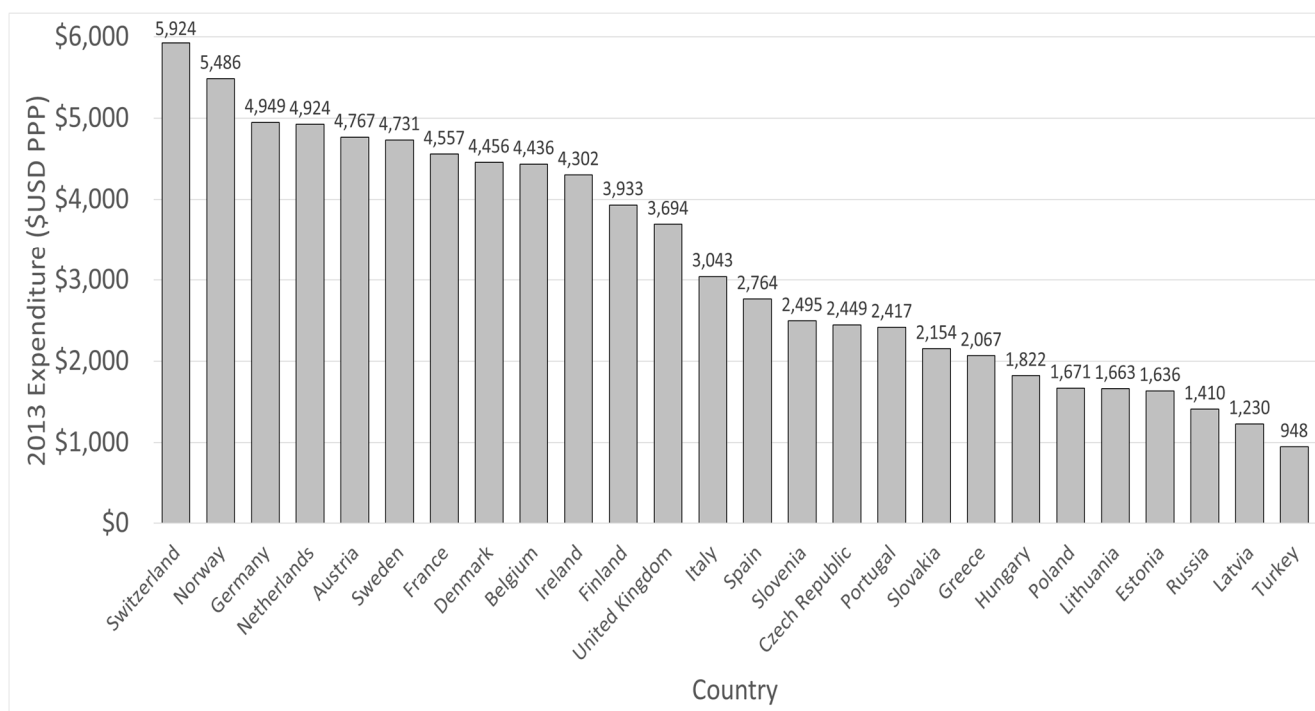

**Figure S5: Health care expenditure per-capita for 2013 at current prices and current purchasing power parities (PPPs) [9].** Note that Germany, United Kingdom, and Denmark each use unique sector definitions, so their expenditure values may not be directly comparable with the other countries. Expenditure data are not available for North Macedonia, Romania, Malta, and Ukraine.



#### S4: Additional data for top 10 countries

**Table S2: Detailed data for 10 European countries**

| Source of data: | World Bank (A)            | OECD (B)                                        | World Bank (C)            | Output of research (D)                        | calculated <sup>1</sup> (E)                                         | calculated <sup>2</sup> (F)                                     | Output of research (G)                       | calculated <sup>3</sup> (H)                                        | calculated <sup>4</sup> (I)                                    | calculated <sup>5</sup> (J)                                                 | calculated <sup>6</sup> (K)                                                                      | Footprint decomposition at third order |                                      |                                      |                                      |                                      |
|-----------------|---------------------------|-------------------------------------------------|---------------------------|-----------------------------------------------|---------------------------------------------------------------------|-----------------------------------------------------------------|----------------------------------------------|--------------------------------------------------------------------|----------------------------------------------------------------|-----------------------------------------------------------------------------|--------------------------------------------------------------------------------------------------|----------------------------------------|--------------------------------------|--------------------------------------|--------------------------------------|--------------------------------------|
| Country         | 2013 GDP (\$USD billions) | OECD health expenditure 2013 USD ppp per capita | 2013 Population (million) | Country consumption extinction-risk footprint | Country consumption extinction-risk footprint per capita (millions) | Country consumption extinction-risk footprint per \$billion GDP | Health care sector extinction-risk footprint | Health care sector extinction-risk footprint per capita (millions) | Health care sector extinction-risk footprint per \$billion GDP | Health care extinction-risk footprint per \$billion Health expenditure OECD | Health care sector extinction-risk footprint as share of total country extinction-risk footprint | Rank 1 intermediate footprint sector   | Rank 2 intermediate footprint sector | Rank 3 intermediate footprint sector | Rank 4 intermediate footprint sector | Rank 5 intermediate footprint sector |
| Netherlands     | 877                       | 4924                                            | 16.8                      | 1388                                          | 83                                                                  | 1.6                                                             | 60.8                                         | 3.6                                                                | 0.07                                                           | 0.73                                                                        | 4.38%                                                                                            | F&B                                    | Agriculture                          | All other                            | Other services                       | Chemicals & Pharmaceuticals          |
| Germany         | 3733                      | 4949                                            | 80.6                      | 5629                                          | 70                                                                  | 1.5                                                             | 241.4                                        | 3.0                                                                | 0.06                                                           | 0.60                                                                        | 4.29%                                                                                            | F&B                                    | Agriculture                          | All other                            | Other services                       | Other products & Manufacturing       |
| Sweden          | 587                       | 4731                                            | 9.6                       | 424                                           | 44                                                                  | 0.7                                                             | 16.4                                         | 1.7                                                                | 0.03                                                           | 0.36                                                                        | 3.88%                                                                                            | All other                              | Other services                       | F&B                                  | Other products & manufacturing       | Agriculture                          |
| Belgium         | 522                       | 4436                                            | 11.2                      | 744                                           | 67                                                                  | 1.4                                                             | 26.7                                         | 2.4                                                                | 0.05                                                           | 0.54                                                                        | 3.59%                                                                                            | F&B                                    | Other                                | Chemicals                            | Health Care services                 | Agriculture                          |
| Portugal        | 226                       | 2417                                            | 10.5                      | 565                                           | 54                                                                  | 2.5                                                             | 19.1                                         | 1.8                                                                | 0.08                                                           | 0.75                                                                        | 3.38%                                                                                            | F&B                                    | Agriculture                          | Chemicals                            | Business services                    | Health Care services                 |
| Ireland         | 239                       | 4302                                            | 4.6                       | 241                                           | 52                                                                  | 1.0                                                             | 8.1                                          | 1.8                                                                | 0.03                                                           | 0.41                                                                        | 3.37%                                                                                            | Other products & manufacturing         | Chemicals                            | All other                            | Health Care services                 | Other services                       |
| Norway          | 523                       | 5486                                            | 5.1                       | 462                                           | 91                                                                  | 0.9                                                             | 15.5                                         | 3.0                                                                | 0.03                                                           | 0.55                                                                        | 3.35%                                                                                            | All other                              | Agriculture                          | Other products & manufacturing       | F&B                                  | Other services                       |
| Switzerland     | 689                       | 5924                                            | 8.1                       | 831                                           | 103                                                                 | 1.2                                                             | 26.9                                         | 3.3                                                                | 0.04                                                           | 0.56                                                                        | 3.24%                                                                                            | F&B                                    | All other                            | Agriculture                          | Other services                       | Chemicals                            |
| Finland         | 271                       | 3933                                            | 5.4                       | 265                                           | 49                                                                  | 1.0                                                             | 8.2                                          | 1.5                                                                | 0.03                                                           | 0.38                                                                        | 3.09%                                                                                            | F&B                                    | Chemicals                            | Agriculture                          | Other services                       | All other                            |
| Austria         | 430                       | 4767                                            | 8.5                       | 641                                           | 76                                                                  | 1.5                                                             | 19.8                                         | 2.3                                                                | 0.05                                                           | 0.49                                                                        | 3.09%                                                                                            | F&B                                    | Chemicals                            | Agriculture                          | Other services                       | All other                            |
| TOTAL           | 8096                      | 4587                                            | 160.4                     | 11191                                         | 70                                                                  | 1.38                                                            | 443                                          | 2.8                                                                | 0.055                                                          | 0.60                                                                        | 3.96%                                                                                            |                                        |                                      |                                      |                                      |                                      |

<sup>1</sup> Calculated by dividing column (D) by column (C)

<sup>2</sup> Calculated by dividing column (D) by column (A)

<sup>3</sup> Calculated by dividing column (G) by column (C)

<sup>4</sup> Calculated by dividing column (G) by column (A)

<sup>5</sup> Calculated by dividing column (G) by [(column (B) × column (C)) ÷ 1000]

<sup>6</sup> Calculated by dividing column (G) by column (D)

Sources: World bank [GDP \(current US\\$\) - Belgium, Germany, Netherlands, Sweden, Switzerland, United Kingdom, Ireland, Norway, Finland, Austria | Data \(worldbank.org\)](#)  
World bank [Population, total - Belgium, Germany, Netherlands, Sweden, Switzerland, Portugal, Ireland, Norway, Finland, Austria | Data \(worldbank.org\)](#)  
OECD [Health expenditure and financing \(oecd.org\)](#)

Note that there is a difference in the way the total footprint and health care footprints are calculated. The consumption footprint includes the demand for all sectors coming from consumption based in that country. The health care footprint uses all demand for the health care sector in that country, regardless of which country that demand comes from. This could be an issue if the cross-country demand is strong (for NLD it is not, it represents 1% of the total).

## S5: Top 40 countries impacted by consumption of Dutch health care products and services

The extinction risk impact of consumption of Dutch health care is overwhelmingly experienced outside of the Netherlands, with 99.96% of the footprint imported. Table S3 includes the top 40 countries impacted by Dutch health care consumption, which together represent 91% of the total Dutch health care extinction-risk footprint.

**Table S3: Top 40 countries impacted by consumption of Dutch health care**

| Impacted Country |     |                                  | % total Dutch health care extinction-risk footprint |
|------------------|-----|----------------------------------|-----------------------------------------------------|
| 1                | MDG | Madagascar                       | 12.2%                                               |
| 2                | ROW | Rest of World <sup>^</sup>       | 10.2%                                               |
| 3                | BRA | Brazil                           | 4.9%                                                |
| 4                | TZA | Tanzania                         | 4.8%                                                |
| 5                | IDN | Indonesia                        | 4.3%                                                |
| 6                | CMR | Cameroon                         | 4.0%                                                |
| 7                | HND | Honduras                         | 3.9%                                                |
| 8                | GTM | Guatemala                        | 3.1%                                                |
| 9                | ETH | Ethiopia                         | 3.0%                                                |
| 10               | GHA | Ghana                            | 2.7%                                                |
| 11               | LKA | Sri Lanka                        | 2.7%                                                |
| 12               | CRI | Costa Rica                       | 2.6%                                                |
| 13               | ZAF | South Africa                     | 2.3%                                                |
| 14               | PER | Peru                             | 2.1%                                                |
| 15               | IND | India                            | 1.9%                                                |
| 16               | PHL | Philippines                      | 1.9%                                                |
| 17               | CIV | Côte d'Ivoire                    | 1.7%                                                |
| 18               | KEN | Kenya                            | 1.5%                                                |
| 19               | ECU | Ecuador                          | 1.5%                                                |
| 20               | ARG | Argentina                        | 1.4%                                                |
| 21               | AUS | Australia                        | 1.4%                                                |
| 22               | COD | Democratic Republic of the Congo | 1.3%                                                |
| 23               | DOM | Dominica                         | 1.3%                                                |
| 24               | MEX | Mexico                           | 1.2%                                                |
| 25               | USA | United States of America         | 1.2%                                                |
| 26               | MYS | Malaysia                         | 1.2%                                                |
| 27               | CHN | China                            | 1.1%                                                |
| 28               | PNG | Papua New Guinea                 | 1.0%                                                |
| 29               | PAN | Panama                           | 1.0%                                                |
| 30               | VNM | Vietnam                          | 0.9%                                                |
| 31               | FRA | France                           | 0.8%                                                |
| 32               | COL | Colombia                         | 0.8%                                                |
| 33               | BOL | Bolivia                          | 0.8%                                                |
| 34               | RUS | Russia                           | 0.8%                                                |
| 35               | CUB | Cuba                             | 0.7%                                                |
| 36               | CHL | Chile                            | 0.6%                                                |
| 37               | GIN | Guinea                           | 0.5%                                                |
| 38               | SUR | Suriname                         | 0.5%                                                |
| 39               | MAR | Morocco                          | 0.5%                                                |
| 40               | STP | São Tomé and Príncipe            | 0.5%                                                |

<sup>^</sup> 'Rest of World' includes 61 countries which are not explicitly included in the Eora MRIO<sup>7</sup> but for which nSTAR data are available.

## S6: Top 10 species impacted by consumption of Dutch health care products and services

The top 10 species impacted by consumption of the products and services provided by the Dutch health care sector are included in Table S4.

**Table S4: Top 10 species impacted by consumption of Dutch health care**

|    | Species / Common name      |                            | Class    | Extinction risk category | Dutch health care extinction-risk footprint (no units) | Percent of species' total extinction-risk footprint |
|----|----------------------------|----------------------------|----------|--------------------------|--------------------------------------------------------|-----------------------------------------------------|
| 1  | Leptotila wellsi           | Grenada Dove               | Aves     | CR                       | 0.46                                                   | 0.13%                                               |
| 2  | Leptodactylus fallax       | Mountain Chicken           | Amphibia | CR                       | 0.45                                                   | 0.13%                                               |
| 3  | Piliocolobus waldroni      | Miss Waldron's Red Colobus | Mammalia | CR                       | 0.42                                                   | 0.12%                                               |
| 4  | Colobus vellerosus         | White-thighed Colobus      | Mammalia | CR                       | 0.42                                                   | 0.10%                                               |
| 5  | Cercopithecus roloway      | Roloway monkey             | Mammalia | CR                       | 0.23                                                   | 0.13%                                               |
| 6  | Pteropus livingstonii      | Livingstone's Flying Fox   | Mammalia | CR                       | 0.21                                                   | 0.13%                                               |
| 7  | Pteropus nitendensis       | Temotu Flying Fox          | Mammalia | EN                       | 0.20                                                   | 0.13%                                               |
| 8  | Cercocebus lunulatus       | White-naped Mangabey       | Mammalia | EN                       | 0.19                                                   | 0.14%                                               |
| 9  | Setophaga angelae          | Elfin Woods Warbler        | Aves     | EN                       | 0.19                                                   | 0.13%                                               |
| 10 | Eleutherodactylus locustus | Locust Coqui               | Amphibia | EN                       | 0.18                                                   | 0.13%                                               |

Extinction risk category abbreviations

CR Critically Endangered

EN Endangered

Further information is available at: [https://nc.iucnredlist.org/redlist/content/attachment\\_files/RedListGuidelines.pdf](https://nc.iucnredlist.org/redlist/content/attachment_files/RedListGuidelines.pdf)

## Supplementary References

- 1 IUCN. The IUCN Red List of Threatened Species. Version 2020-2, 2020.
- 2 Butchart SHM, Stattersfield AJ, Bennun LA, et al. Measuring global trends in the status of biodiversity: red list indices for birds. *PLoS Biology* 2004; **2**(12): e383-e.
- 3 Mair L, Bennun LA, Brooks TM, et al. A metric for spatially explicit contributions to science-based species targets. *Nature Ecology & Evolution* 2021; **5**: 836–844.
- 4 IUCN. Threats Classification Scheme (Version 3.2), 2020.
- 5 Strassburg BBN, Iribarrem A, Beyer HL, et al. Global priority areas for ecosystem restoration. *Nature* 2020; **586**(7831): 724-9.
- 6 Irwin A, Geschke A, Brooks TM, Siikamäki J, Mair L, Strassburg BBN. Quantifying and categorising national extinction-risk footprints. *Scientific Reports* 2022; **12**(1): 5861.
- 7 Lenzen M, Moran D, Kanemoto K, Geschke A. Building Eora: A global multi-region input-output database at high country and sector resolution. *Economic Systems Research: Global Multiregional Input-Output Frameworks* 2013; **25**(1): 20-49.
- 8 Oosterhaven J, Stelder D. Net Multipliers Avoid Exaggerating Impacts: With A Bi-Regional Illustration for the Dutch Transportation Sector. *Journal of Regional Science* 2002; **42**(3): 533-43.
- 9 OECD. Health expenditure and financing, per capita, current prices. 2013. <https://stats.oecd.org/Index.aspx?DataSetCode=SHA> (accessed May 6, 2021).
